# Supplementary material for: Genome-wide specificity of plant genome editing by both CRISPR–Cas9 and TALEN
Source: PubMed Central journal article supplement (PMC9167288; doi:10.1038/s41598-022-13034-2), 2022-06-04
Supplement: 41598_2022_13034_MOESM2_ESM.pdf [file 41598_2022_13034_MOESM2_ESM.pdf]

| INDEX | FILE | NAME | TYPE | STATUS | PROVIDER | URL1 | URL2 | URL3 | URL4 | URL5 | URL6 | URL7 | URL8 | URL9 | URL10 | URL11 | URL12 | URL13 | URL14 | URL15 | URL16 | URL17 | URL18 | URL19 | URL20 | URL21 | URL22 | URL23 | URL24 | URL25 | URL26 | URL27 | URL28 | URL29 | URL30 | URL31 | URL32 | URL33 | URL34 | URL35 | URL36 | URL37 | URL38 | URL39 | URL40 | URL41 | URL42 | URL43 | URL44 | URL45 | URL46 | URL47 | URL48 | URL49 | URL50 | URL51 | URL52 | URL53 | URL54 | URL55 | URL56 | URL57 | URL58 | URL59 | URL60 | URL61 | URL62 | URL63 | URL64 | URL65 | URL66 | URL67 | URL68 | URL69 | URL70 | URL71 | URL72 | URL73 | URL74 | URL75 | URL76 | URL77 | URL78 | URL79 | URL80 | URL81 | URL82 | URL83 | URL84 | URL85 | URL86 | URL87 | URL88 | URL89 | URL90 | URL91 | URL92 | URL93 | URL94 | URL95 | URL96 | URL97 | URL98 | URL99 | URL100 | URL101 | URL102 | URL103 | URL104 | URL105 | URL106 | URL107 | URL108 | URL109 | URL110 | URL111 | URL112 | URL113 | URL114 | URL115 | URL116 | URL117 | URL118 | URL119 | URL120 | URL121 | URL122 | URL123 | URL124 | URL125 | URL126 | URL127 | URL128 | URL129 | URL130 | URL131 | URL132 | URL133 | URL134 | URL135 | URL136 | URL137 | URL138 | URL139 | URL140 | URL141 | URL142 | URL143 | URL144 | URL145 | URL146 | URL147 | URL148 | URL149 | URL150 | URL151 | URL152 | URL153 | URL154 | URL155 | URL156 | URL157 | URL158 | URL159 | URL160 | URL161 | URL162 | URL163 | URL164 | URL165 | URL166 | URL167 | URL168 | URL169 | URL170 | URL171 | URL172 | URL173 | URL174 | URL175 | URL176 | URL177 | URL178 | URL179 | URL180 | URL181 | URL182 | URL183 | URL184 | URL185 | URL186 | URL187 | URL188 | URL189 | URL190 | URL191 | URL192 | URL193 | URL194 | URL195 | URL196 | URL197 | URL198 | URL199 | URL200 | URL201 | URL202 | URL203 | URL204 | URL205 | URL206 | URL207 | URL208 | URL209 | URL210 | URL211 | URL212 | URL213 | URL214 | URL215 | URL216 | URL217 | URL218 | URL219 | URL220 | URL221 | URL222 | URL223 | URL224 | URL225 | URL226 | URL227 | URL228 | URL229 | URL230 | URL231 | URL232 | URL233 | URL234 | URL235 | URL236 | URL237 | URL238 | URL239 | URL240 | URL241 | URL242 | URL243 | URL244 | URL245 | URL246 | URL247 | URL248 | URL249 | URL250 | URL251 | URL252 | URL253 | URL254 | URL255 | URL256 | URL257 | URL258 | URL259 | URL260 | URL261 | URL262 | URL263 | URL264 | URL265 | URL266 | URL267 | URL268 | URL269 | URL270 | URL271 | URL272 | URL273 | URL274 | URL275 | URL276 | URL277 | URL278 | URL279 | URL280 | URL281 | URL282 | URL283 | URL284 | URL285 | URL286 | URL287 | URL288 | URL289 | URL290 | URL291 | URL292 | URL293 | URL294 | URL295 | URL296 | URL297 | URL298 | URL299 | URL300 | URL301 | URL302 | URL303 | URL304 | URL305 | URL306 | URL307 | URL308 | URL309 | URL310 | URL311 | URL312 | URL313 | URL314 | URL315 | URL316 | URL317 | URL318 | URL319 | URL320 | URL321 | URL322 | URL323 | URL324 | URL325 | URL326 | URL327 | URL328 | URL329 | URL330 | URL331 | URL332 | URL333 | URL334 | URL335 | URL336 | URL337 | URL338 | URL339 | URL340 | URL341 | URL342 | URL343 | URL344 | URL345 | URL346 | URL347 | URL348 | URL349 | URL350 | URL351 | URL352 | URL353 | URL354 | URL355 | URL356 | URL357 | URL358 | URL359 | URL360 | URL361 | URL362 | URL363 | URL364 | URL365 | URL366 | URL367 | URL368 | URL369 | URL370 | URL371 | URL372 | URL373 | URL374 | URL375 | URL376 | URL377 | URL378 | URL379 | URL380 | URL381 | URL382 | URL383 | URL384 | URL385 | URL386 | URL387 | URL388 | URL389 | URL390 | URL391 | URL392 | URL393 | URL394 | URL395 | URL396 | URL397 | URL398 | URL399 | URL400 | URL401 | URL402 | URL403 | URL404 | URL405 | URL406 | URL407 | URL408 | URL409 | URL410 | URL411 | URL412 | URL413 | URL414 | URL415 | URL416 | URL417 | URL418 | URL419 | URL420 | URL421 | URL422 | URL423 | URL424 | URL425 | URL426 | URL427 | URL428 | URL429 | URL430 | URL431 | URL432 | URL433 | URL434 | URL435 | URL436 | URL437 | URL438 | URL439 | URL440 | URL441 | URL442 | URL443 | URL444 | URL445 | URL446 | URL447 | URL448 | URL449 | URL450 | URL451 | URL452 | URL453 | URL454 | URL455 | URL456 | URL457 | URL458 | URL459 | URL460 | URL461 | URL462 | URL463 | URL464 | URL465 | URL466 | URL467 | URL468 | URL469 | URL470 | URL471 | URL472 | URL473 | URL474 | URL475 | URL476 | URL477 | URL478 | URL479 | URL480 | URL481 | URL482 | URL483 | URL484 | URL485 | URL486 | URL487 | URL488 | URL489 | URL490 | URL491 | URL492 | URL493 | URL494 | URL495 | URL496 | URL497 | URL498 | URL499 | URL500 | URL501 | URL502 | URL503 | URL504 | URL505 | URL506 | URL507 | URL508 | URL509 | URL510 | URL511 | URL512 | URL513 | URL514 | URL515 | URL516 | URL517 | URL518 | URL519 | URL520 | URL521 | URL522 | URL523 | URL524 | URL525 | URL526 | URL527 | URL528 | URL529 | URL530 | URL531 | URL532 | URL533 | URL534 | URL535 | URL536 | URL537 | URL538 | URL539 | URL540 | URL541 | URL542 | URL543 | URL544 | URL545 | URL546 | URL547 | URL548 | URL549 | URL550 | URL551 | URL552 | URL553 | URL554 | URL555 | URL556 | URL557 | URL558 | URL559 | URL560 | URL561 | URL562 | URL563 | URL564 | URL565 | URL566 | URL567 | URL568 | URL569 | URL570 | URL571 | URL572 | URL573 | URL574 | URL575 | URL576 | URL577 | URL578 | URL579 | URL580 | URL581 | URL582 | URL583 | URL584 | URL585 | URL586 | URL587 | URL588 | URL589 | URL590 | URL591 | URL592 | URL593 | URL594 | URL595 | URL596 | URL597 | URL598 | URL599 | URL600 | URL601 | URL602 | URL603 | URL604 | URL605 | URL606 | URL607 | URL608 | URL609 | URL610 | URL611 | URL612 | URL613 | URL614 | URL615 | URL616 | URL617 | URL618 | URL619 | URL620 | URL621 | URL622 | URL623 | URL624 | URL625 | URL626 | URL627 | URL628 | URL629 | URL630 | URL631 | URL632 | URL633 | URL634 | URL635 | URL636 | URL637 | URL638 | URL639 | URL640 | URL641 | URL642 | URL643 | URL644 | URL645 | URL646 | URL647 | URL648 | URL649 | URL650 | URL651 | URL652 | URL653 | URL654 | URL655 | URL656 | URL657 | URL658 | URL659 | URL660 | URL661 | URL662 | URL663 | URL664 | URL665 | URL666 | URL667 | URL668 | URL669 | URL670 | URL671 | URL672 | URL673 | URL674 | URL675 | URL676 | URL677 | URL678 | URL679 | URL680 | URL681 | URL682 | URL683 | URL684 | URL685 | URL686 | URL687 | URL688 | URL689 | URL690 | URL691 | URL692 | URL693 | URL694 | URL695 | URL696 | URL697 | URL698 | URL699 | URL700 | URL701 | URL702 | URL703 | URL704 | URL705 | URL706 | URL707 | URL708 | URL709 | URL710 | URL711 | URL712 | URL713 | URL714 | URL715 | URL716 | URL717 | URL718 | URL719 | URL720 | URL721 | URL722 | URL723 | URL724 | URL725 | URL726 | URL727 | URL728 | URL729 | URL730 | URL731 | URL732 | URL733 | URL734 | URL735 | URL736 | URL737 | URL738 | URL739 | URL740 | URL741 | URL742 | URL743 | URL744 | URL745 | URL746 | URL747 | URL748 | URL749 | URL750 | URL751 | URL752 | URL753 | URL754 | URL755 | URL756 | URL757 | URL758 | URL759 | URL760 | URL761 | URL762 | URL763 | URL764 | URL765 | URL766 | URL767 | URL768 | URL769 | URL770 | URL771 | URL772 | URL773 | URL774 | URL775 | URL776 | URL777 | URL778 | URL779 | URL780 | URL781 | URL782 | URL783 | URL784 | URL785 | URL786 | URL787 | URL788 | URL789 | URL790 | URL791 | URL792 | URL793 | URL794 | URL795 | URL796 | URL797 | URL798 | URL799 | URL800 | URL801 | URL802 | URL803 | URL804 | URL805 | URL806 | URL807 | URL808 | URL809 | URL810 | URL811 | URL812 | URL813 | URL814 | URL815 | URL816 | URL817 | URL818 | URL819 | URL820 | URL821 | URL822 | URL823 | URL824 | URL825 | URL826 | URL827 | URL828 | URL829 | URL830 | URL831 | URL832 | URL833 | URL834 | URL835 | URL836 | URL837 | URL838 | URL839 | URL840 | URL841 | URL842 | URL843 | URL844 | URL845 | URL846 | URL847 | URL848 | URL849 | URL850 | URL851 | URL852 | URL853 | URL854 | URL855 | URL856 | URL857 | URL858 | URL859 | URL860 | URL861 | URL862 | URL863 | URL864 | URL865 | URL866 | URL867 | URL868 | URL869 | URL870 | URL871 | URL872 | URL873 | URL874 | URL875 | URL876 | URL877 | URL878 | URL879 | URL880 | URL881 | URL882 | URL883 | URL884 | URL885 | URL886 | URL887 | URL888 | URL889 | URL890 | URL891 | URL892 | URL893 | URL894 | URL895 | URL896 | URL897 | URL898 | URL899 | URL900 | URL901 | URL902 | URL903 | URL904 | URL905 | URL906 | URL907 | URL908 | URL909 | URL910 | URL911 | URL912 | URL913 | URL914 | URL915 | URL916 | URL917 | URL918 | URL919 | URL920 | URL921 | URL922 | URL923 | URL924 | URL925 | URL926 | URL927 | URL928 | URL929 | URL930 | URL931 | URL932 | URL933 | URL934 | URL935 | URL936 | URL937 | URL938 | URL939 | URL940 | URL941 | URL942 | URL943 | URL944 | URL945 | URL946 | URL947 | URL948 | URL949 | URL950 | URL951 | URL952 | URL953 | URL954 | URL955 | URL956 | URL957 | URL958 | URL959 | URL960 | URL961 | URL962 | URL963 | URL964 | URL965 | URL966 | URL967 | URL968 | URL969 | URL970 | URL971 | URL972 | URL973 | URL974 | URL975 | URL976 | URL977 | URL978 | URL979 | URL980 | URL981 | URL982 | URL983 | URL984 | URL985 | URL986 | URL987 | URL988 | URL989 | URL990 | URL991 | URL992 | URL993 | URL994 | URL995 | URL996 | URL997 | URL998 | URL999 | URL1000 |
|-------|------|------|------|--------|----------|------|------|------|------|------|------|------|------|------|-------|-------|-------|-------|-------|-------|-------|-------|-------|-------|-------|-------|-------|-------|-------|-------|-------|-------|-------|-------|-------|-------|-------|-------|-------|-------|-------|-------|-------|-------|-------|-------|-------|-------|-------|-------|-------|-------|-------|-------|-------|-------|-------|-------|-------|-------|-------|-------|-------|-------|-------|-------|-------|-------|-------|-------|-------|-------|-------|-------|-------|-------|-------|-------|-------|-------|-------|-------|-------|-------|-------|-------|-------|-------|-------|-------|-------|-------|-------|-------|-------|-------|-------|-------|-------|-------|-------|-------|-------|-------|--------|--------|--------|--------|--------|--------|--------|--------|--------|--------|--------|--------|--------|--------|--------|--------|--------|--------|--------|--------|--------|--------|--------|--------|--------|--------|--------|--------|--------|--------|--------|--------|--------|--------|--------|--------|--------|--------|--------|--------|--------|--------|--------|--------|--------|--------|--------|--------|--------|--------|--------|--------|--------|--------|--------|--------|--------|--------|--------|--------|--------|--------|--------|--------|--------|--------|--------|--------|--------|--------|--------|--------|--------|--------|--------|--------|--------|--------|--------|--------|--------|--------|--------|--------|--------|--------|--------|--------|--------|--------|--------|--------|--------|--------|--------|--------|--------|--------|--------|--------|--------|--------|--------|--------|--------|--------|--------|--------|--------|--------|--------|--------|--------|--------|--------|--------|--------|--------|--------|--------|--------|--------|--------|--------|--------|--------|--------|--------|--------|--------|--------|--------|--------|--------|--------|--------|--------|--------|--------|--------|--------|--------|--------|--------|--------|--------|--------|--------|--------|--------|--------|--------|--------|--------|--------|--------|--------|--------|--------|--------|--------|--------|--------|--------|--------|--------|--------|--------|--------|--------|--------|--------|--------|--------|--------|--------|--------|--------|--------|--------|--------|--------|--------|--------|--------|--------|--------|--------|--------|--------|--------|--------|--------|--------|--------|--------|--------|--------|--------|--------|--------|--------|--------|--------|--------|--------|--------|--------|--------|--------|--------|--------|--------|--------|--------|--------|--------|--------|--------|--------|--------|--------|--------|--------|--------|--------|--------|--------|--------|--------|--------|--------|--------|--------|--------|--------|--------|--------|--------|--------|--------|--------|--------|--------|--------|--------|--------|--------|--------|--------|--------|--------|--------|--------|--------|--------|--------|--------|--------|--------|--------|--------|--------|--------|--------|--------|--------|--------|--------|--------|--------|--------|--------|--------|--------|--------|--------|--------|--------|--------|--------|--------|--------|--------|--------|--------|--------|--------|--------|--------|--------|--------|--------|--------|--------|--------|--------|--------|--------|--------|--------|--------|--------|--------|--------|--------|--------|--------|--------|--------|--------|--------|--------|--------|--------|--------|--------|--------|--------|--------|--------|--------|--------|--------|--------|--------|--------|--------|--------|--------|--------|--------|--------|--------|--------|--------|--------|--------|--------|--------|--------|--------|--------|--------|--------|--------|--------|--------|--------|--------|--------|--------|--------|--------|--------|--------|--------|--------|--------|--------|--------|--------|--------|--------|--------|--------|--------|--------|--------|--------|--------|--------|--------|--------|--------|--------|--------|--------|--------|--------|--------|--------|--------|--------|--------|--------|--------|--------|--------|--------|--------|--------|--------|--------|--------|--------|--------|--------|--------|--------|--------|--------|--------|--------|--------|--------|--------|--------|--------|--------|--------|--------|--------|--------|--------|--------|--------|--------|--------|--------|--------|--------|--------|--------|--------|--------|--------|--------|--------|--------|--------|--------|--------|--------|--------|--------|--------|--------|--------|--------|--------|--------|--------|--------|--------|--------|--------|--------|--------|--------|--------|--------|--------|--------|--------|--------|--------|--------|--------|--------|--------|--------|--------|--------|--------|--------|--------|--------|--------|--------|--------|--------|--------|--------|--------|--------|--------|--------|--------|--------|--------|--------|--------|--------|--------|--------|--------|--------|--------|--------|--------|--------|--------|--------|--------|--------|--------|--------|--------|--------|--------|--------|--------|--------|--------|--------|--------|--------|--------|--------|--------|--------|--------|--------|--------|--------|--------|--------|--------|--------|--------|--------|--------|--------|--------|--------|--------|--------|--------|--------|--------|--------|--------|--------|--------|--------|--------|--------|--------|--------|--------|--------|--------|--------|--------|--------|--------|--------|--------|--------|--------|--------|--------|--------|--------|--------|--------|--------|--------|--------|--------|--------|--------|--------|--------|--------|--------|--------|--------|--------|--------|--------|--------|--------|--------|--------|--------|--------|--------|--------|--------|--------|--------|--------|--------|--------|--------|--------|--------|--------|--------|--------|--------|--------|--------|--------|--------|--------|--------|--------|--------|--------|--------|--------|--------|--------|--------|--------|--------|--------|--------|--------|--------|--------|--------|--------|--------|--------|--------|--------|--------|--------|--------|--------|--------|--------|--------|--------|--------|--------|--------|--------|--------|--------|--------|--------|--------|--------|--------|--------|--------|--------|--------|--------|--------|--------|--------|--------|--------|--------|--------|--------|--------|--------|--------|--------|--------|--------|--------|--------|--------|--------|--------|--------|--------|--------|--------|--------|--------|--------|--------|--------|--------|--------|--------|--------|--------|--------|--------|--------|--------|--------|--------|--------|--------|--------|--------|--------|--------|--------|--------|--------|--------|--------|--------|--------|--------|--------|--------|--------|--------|--------|--------|--------|--------|--------|--------|--------|--------|--------|--------|--------|--------|--------|--------|--------|--------|--------|--------|--------|--------|--------|--------|--------|--------|--------|--------|--------|--------|--------|--------|--------|--------|--------|--------|--------|--------|--------|--------|--------|--------|--------|--------|--------|--------|--------|--------|--------|--------|--------|--------|--------|--------|--------|--------|--------|--------|--------|--------|--------|--------|--------|--------|--------|--------|--------|--------|--------|--------|--------|--------|--------|--------|--------|--------|--------|--------|--------|--------|--------|--------|--------|--------|--------|--------|--------|--------|--------|--------|--------|--------|--------|--------|--------|--------|--------|--------|--------|--------|--------|--------|--------|--------|--------|--------|--------|--------|--------|--------|--------|--------|--------|--------|--------|--------|--------|--------|--------|--------|--------|--------|--------|--------|--------|--------|--------|--------|--------|--------|--------|--------|--------|--------|--------|--------|--------|--------|--------|--------|--------|--------|--------|--------|--------|--------|--------|--------|--------|--------|--------|--------|--------|--------|--------|--------|--------|--------|--------|--------|--------|--------|--------|--------|--------|--------|--------|--------|--------|--------|--------|--------|--------|--------|--------|--------|--------|--------|--------|--------|--------|--------|--------|--------|--------|--------|--------|--------|--------|--------|--------|--------|--------|--------|--------|--------|--------|--------|--------|--------|--------|---------|
|-------|------|------|------|--------|----------|------|------|------|------|------|------|------|------|------|-------|-------|-------|-------|-------|-------|-------|-------|-------|-------|-------|-------|-------|-------|-------|-------|-------|-------|-------|-------|-------|-------|-------|-------|-------|-------|-------|-------|-------|-------|-------|-------|-------|-------|-------|-------|-------|-------|-------|-------|-------|-------|-------|-------|-------|-------|-------|-------|-------|-------|-------|-------|-------|-------|-------|-------|-------|-------|-------|-------|-------|-------|-------|-------|-------|-------|-------|-------|-------|-------|-------|-------|-------|-------|-------|-------|-------|-------|-------|-------|-------|-------|-------|-------|-------|-------|-------|-------|-------|-------|--------|--------|--------|--------|--------|--------|--------|--------|--------|--------|--------|--------|--------|--------|--------|--------|--------|--------|--------|--------|--------|--------|--------|--------|--------|--------|--------|--------|--------|--------|--------|--------|--------|--------|--------|--------|--------|--------|--------|--------|--------|--------|--------|--------|--------|--------|--------|--------|--------|--------|--------|--------|--------|--------|--------|--------|--------|--------|--------|--------|--------|--------|--------|--------|--------|--------|--------|--------|--------|--------|--------|--------|--------|--------|--------|--------|--------|--------|--------|--------|--------|--------|--------|--------|--------|--------|--------|--------|--------|--------|--------|--------|--------|--------|--------|--------|--------|--------|--------|--------|--------|--------|--------|--------|--------|--------|--------|--------|--------|--------|--------|--------|--------|--------|--------|--------|--------|--------|--------|--------|--------|--------|--------|--------|--------|--------|--------|--------|--------|--------|--------|--------|--------|--------|--------|--------|--------|--------|--------|--------|--------|--------|--------|--------|--------|--------|--------|--------|--------|--------|--------|--------|--------|--------|--------|--------|--------|--------|--------|--------|--------|--------|--------|--------|--------|--------|--------|--------|--------|--------|--------|--------|--------|--------|--------|--------|--------|--------|--------|--------|--------|--------|--------|--------|--------|--------|--------|--------|--------|--------|--------|--------|--------|--------|--------|--------|--------|--------|--------|--------|--------|--------|--------|--------|--------|--------|--------|--------|--------|--------|--------|--------|--------|--------|--------|--------|--------|--------|--------|--------|--------|--------|--------|--------|--------|--------|--------|--------|--------|--------|--------|--------|--------|--------|--------|--------|--------|--------|--------|--------|--------|--------|--------|--------|--------|--------|--------|--------|--------|--------|--------|--------|--------|--------|--------|--------|--------|--------|--------|--------|--------|--------|--------|--------|--------|--------|--------|--------|--------|--------|--------|--------|--------|--------|--------|--------|--------|--------|--------|--------|--------|--------|--------|--------|--------|--------|--------|--------|--------|--------|--------|--------|--------|--------|--------|--------|--------|--------|--------|--------|--------|--------|--------|--------|--------|--------|--------|--------|--------|--------|--------|--------|--------|--------|--------|--------|--------|--------|--------|--------|--------|--------|--------|--------|--------|--------|--------|--------|--------|--------|--------|--------|--------|--------|--------|--------|--------|--------|--------|--------|--------|--------|--------|--------|--------|--------|--------|--------|--------|--------|--------|--------|--------|--------|--------|--------|--------|--------|--------|--------|--------|--------|--------|--------|--------|--------|--------|--------|--------|--------|--------|--------|--------|--------|--------|--------|--------|--------|--------|--------|--------|--------|--------|--------|--------|--------|--------|--------|--------|--------|--------|--------|--------|--------|--------|--------|--------|--------|--------|--------|--------|--------|--------|--------|--------|--------|--------|--------|--------|--------|--------|--------|--------|--------|--------|--------|--------|--------|--------|--------|--------|--------|--------|--------|--------|--------|--------|--------|--------|--------|--------|--------|--------|--------|--------|--------|--------|--------|--------|--------|--------|--------|--------|--------|--------|--------|--------|--------|--------|--------|--------|--------|--------|--------|--------|--------|--------|--------|--------|--------|--------|--------|--------|--------|--------|--------|--------|--------|--------|--------|--------|--------|--------|--------|--------|--------|--------|--------|--------|--------|--------|--------|--------|--------|--------|--------|--------|--------|--------|--------|--------|--------|--------|--------|--------|--------|--------|--------|--------|--------|--------|--------|--------|--------|--------|--------|--------|--------|--------|--------|--------|--------|--------|--------|--------|--------|--------|--------|--------|--------|--------|--------|--------|--------|--------|--------|--------|--------|--------|--------|--------|--------|--------|--------|--------|--------|--------|--------|--------|--------|--------|--------|--------|--------|--------|--------|--------|--------|--------|--------|--------|--------|--------|--------|--------|--------|--------|--------|--------|--------|--------|--------|--------|--------|--------|--------|--------|--------|--------|--------|--------|--------|--------|--------|--------|--------|--------|--------|--------|--------|--------|--------|--------|--------|--------|--------|--------|--------|--------|--------|--------|--------|--------|--------|--------|--------|--------|--------|--------|--------|--------|--------|--------|--------|--------|--------|--------|--------|--------|--------|--------|--------|--------|--------|--------|--------|--------|--------|--------|--------|--------|--------|--------|--------|--------|--------|--------|--------|--------|--------|--------|--------|--------|--------|--------|--------|--------|--------|--------|--------|--------|--------|--------|--------|--------|--------|--------|--------|--------|--------|--------|--------|--------|--------|--------|--------|--------|--------|--------|--------|--------|--------|--------|--------|--------|--------|--------|--------|--------|--------|--------|--------|--------|--------|--------|--------|--------|--------|--------|--------|--------|--------|--------|--------|--------|--------|--------|--------|--------|--------|--------|--------|--------|--------|--------|--------|--------|--------|--------|--------|--------|--------|--------|--------|--------|--------|--------|--------|--------|--------|--------|--------|--------|--------|--------|--------|--------|--------|--------|--------|--------|--------|--------|--------|--------|--------|--------|--------|--------|--------|--------|--------|--------|--------|--------|--------|--------|--------|--------|--------|--------|--------|--------|--------|--------|--------|--------|--------|--------|--------|--------|--------|--------|--------|--------|--------|--------|--------|--------|--------|--------|--------|--------|--------|--------|--------|--------|--------|--------|--------|--------|--------|--------|--------|--------|--------|--------|--------|--------|--------|--------|--------|--------|--------|--------|--------|--------|--------|--------|--------|--------|--------|--------|--------|--------|--------|--------|--------|--------|--------|--------|--------|--------|--------|--------|--------|--------|--------|--------|--------|--------|--------|--------|--------|--------|--------|--------|--------|--------|--------|--------|--------|--------|--------|--------|--------|--------|--------|--------|--------|--------|--------|--------|--------|--------|--------|--------|--------|--------|--------|--------|--------|--------|--------|--------|--------|--------|--------|--------|--------|--------|--------|--------|--------|--------|--------|--------|--------|--------|--------|--------|--------|--------|--------|--------|--------|--------|--------|--------|--------|--------|--------|--------|--------|--------|--------|--------|--------|--------|--------|--------|--------|--------|--------|--------|--------|--------|--------|--------|--------|--------|--------|--------|--------|--------|--------|--------|--------|--------|--------|---------|
