# Supplementary material for: Genome-wide specificity of plant genome editing by both CRISPR–Cas9 and TALEN
Source: PubMed Central journal article supplement (PMC9167288; doi:10.1038/s41598-022-13034-2), 2022-06-04
Supplement: 41598_2022_13034_MOESM3_ESM.pdf [file 41598_2022_13034_MOESM3_ESM.pdf]

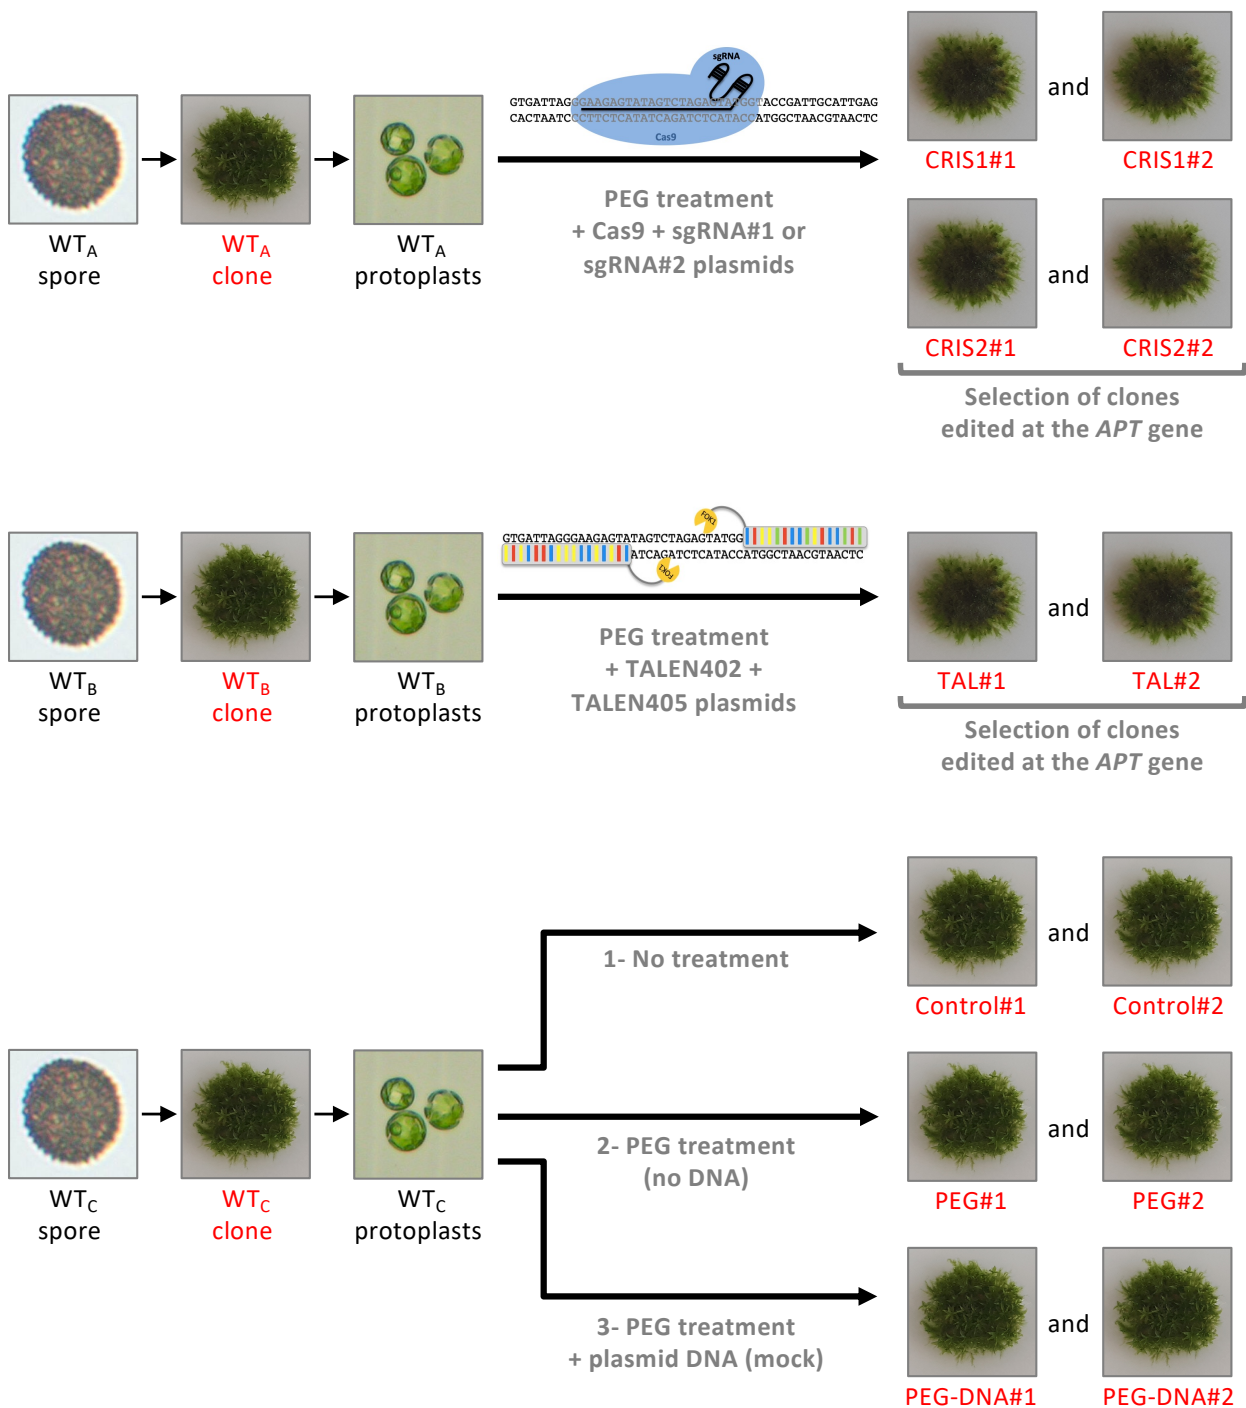

**Figure S1. Schematic diagram of the whole procedure of the CRISPR-Cas and TALEN systems for gene editing in *P. patens* plants.**

Wild-type plants issued from WT<sub>A</sub>, WT<sub>B</sub> and WT<sub>C</sub> single spores were vegetatively propagated with regular grinding of protonemal tissue for at least 8 weeks to give respectively the WT<sub>A</sub>, WT<sub>B</sub> and WT<sub>C</sub> clones. Wild type protoplasts are issued from 6-day-old protonemal tissue from the WT<sub>A</sub>, WT<sub>B</sub> or WT<sub>C</sub> clones. Non treated or treated (PEG, PEG + mock plasmid, PEG + SDNs plasmids) regenerating plants where vegetatively propagated with regular grinding of protonemal tissue for 8 weeks before DNA extraction. Wild-type, controls and edited plants in red are the ones that have been sequenced. Pictures of this figure are just symbolic and do not represent the actual samples/plants that have been used in the study.

**TALen<sub>402</sub>-TALen<sub>405</sub>**

|        | TALen <sub>402</sub>                                                | TALen <sub>405</sub> |
|--------|---------------------------------------------------------------------|----------------------|
| WT     | AGGCCCTGTGATTAGGGAAAGAGTATAGTCTAGAGTATGGTACCGATTGCATTGAGATGCACGTTGG |                      |
| TAL#1  | AGGCCCTGTGATTAGGGAAAGAGTATAGTCTAGAGTATGGTACCGATTGCATTGAGATGCACGTTGG |                      |
| TAL#2  | AGGCCCTGTGATTAGGGAAAGAGTATAGTCTAGAGTATGGTACCGATTGCATTGAGATGCACGTTGG |                      |
| TAL#3  | AGGCCCTGTGATTAGGGAAAGAGTATAGTCTAGAGTATGGTACCGATTGCATTGAGATGCACGTTGG |                      |
| TAL#4  | AGGCCCTGTGATTAGGGAAAGAGTATAGTCTAGAGTATGGTACCGATTGCATTGAGATGCACGTTGG |                      |
| TAL#5  | AGGCCCTGTGATTAGGGAAAGAGTATAGTCTAGAGTATGGTACCGATTGCATTGAGATGCACGTTGG |                      |
| TAL#6  | AGGCCCTGTGATTAGGGAAAGAGTATAGTCTAGAGTATGGTACCGATTGCATTGAGATGCACGTTGG |                      |
| TAL#7  | AGGCCCTGTGATTAGGGAAAGAGTATAGTCTAGAGTATGGTACCGATTGCATTGAGATGCACGTTGG |                      |
| TAL#8  | AGGCCCTGTGATTAGGGAAAGAGTATAGTCTAGAGTATGGTACCGATTGCATTGAGATGCACGTTGG |                      |
| TAL#9  | AGGCCCTGTGATTAGGGAAAGAGTATAGTCTAGAGTATGGTACCGATTGCATTGAGATGCACGTTGG |                      |
| TAL#10 | AGGCCCTGTGATTAGGGAAAGAGTATAGTCTAGAGTATGGTACCGATTGCATTGAGATGCACGTTGG |                      |
| TAL#11 | AGGCCCTGTGATTAGGGAAAGAGTATAGTCTAGAGTATGGTACCGATTGCATTGAGATGCACGTTGG |                      |
| TAL#12 | AGGCCCTGTGATTAGGGAAAGAGTATAGTCTAGAGTATGGTACCGATTGCATTGAGATGCACGTTGG |                      |
| TAL#13 | AGGCCCTGTGATTAGGGAAAGAGTATAGTCTAGAGTATGGTACCGATTGCATTGAGATGCACGTTGG |                      |
| TAL#14 | AGGCCCTGTGATTAGGGAAAGAGTATAGTCTAGAGTATGGTACCGATTGCATTGAGATGCACGTTGG |                      |

**Figure S2. Mutations induced by the TALEN system on the *APT* gene.**

Blue and purple letters plus arrows indicate the sequences targeted by TALen<sub>402</sub> and TALen<sub>405</sub> respectively, in red target sequence for the FOK1 nuclease dimer. Point mutations are in bold capital letters on a yellow background and deletions with dashes. In the frames, the microhomologies potentially involved in Alt-EJ-mediated repair of the TALEN-induced DSBs.

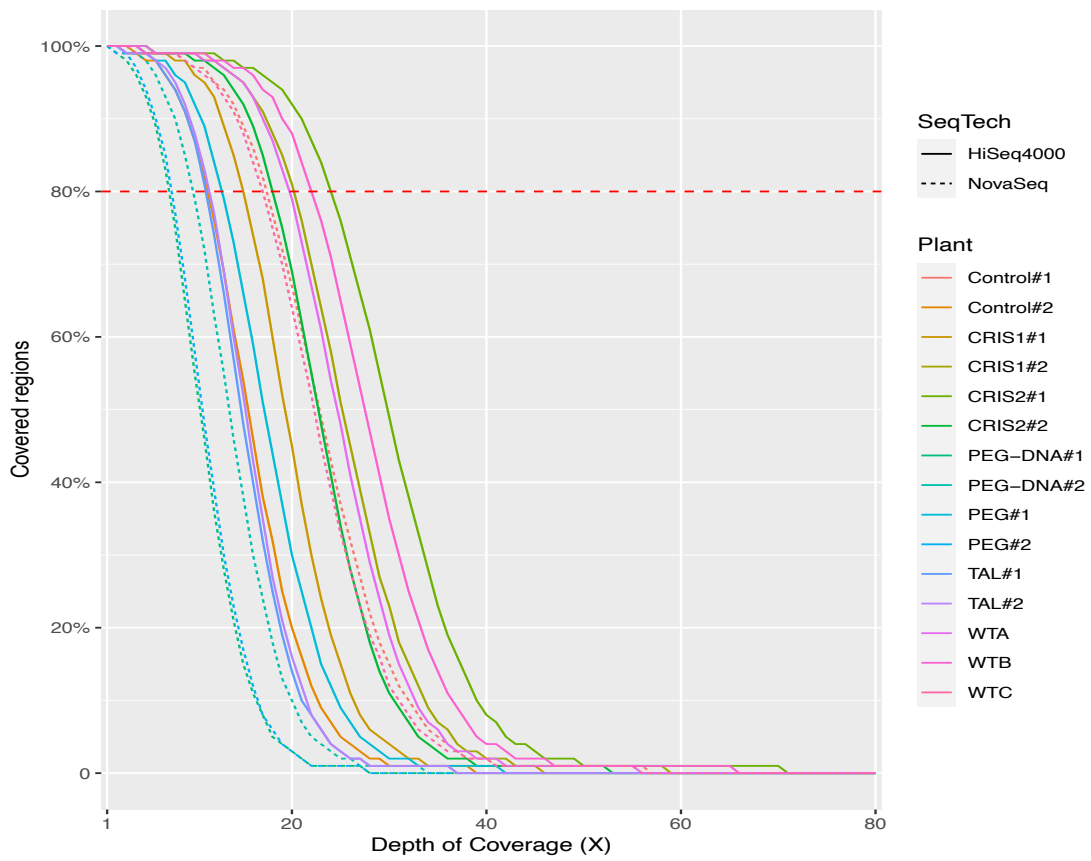

**Figure S3. Depth of coverage.**  
 Mean sequencing read depth for each conditions.

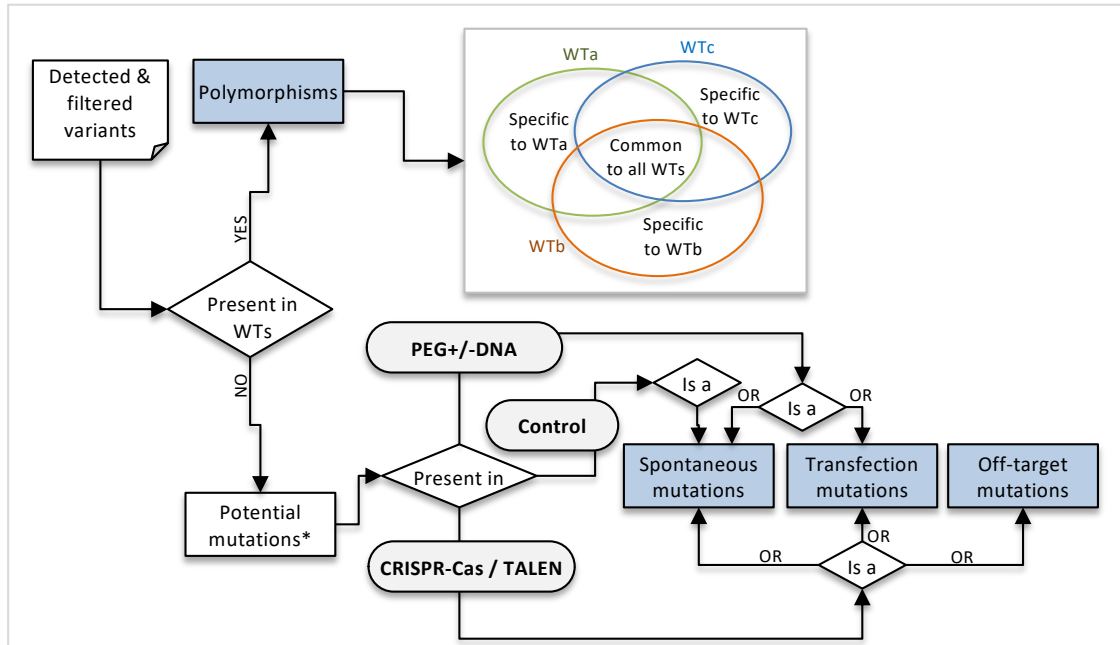

**Figure S4. Classification of variants.**

The variants detected in WTs are classified as polymorphisms. We distinguish the polymorphisms common to the three WTs and polymorphisms specific to each WT line. Variants considered as potential mutations are those detected in treated plants but not in corresponding parents (WT). The spontaneous mutations can occur in control or treated plants, thus present in all treated plants. The mutations due to transfection can occur in plants that have undergone treatment with PEG, thus present in treated plants. The SDN induced mutations (target mutations and off-target mutations) can occur only in plant that have undergone treatment with SDN (CRISPR-Cas or TALEN in our case).

\* The variants present in treated plants and also in parents but at sub-clonal level are considered as chimeric variants and classified as spontaneous mutations

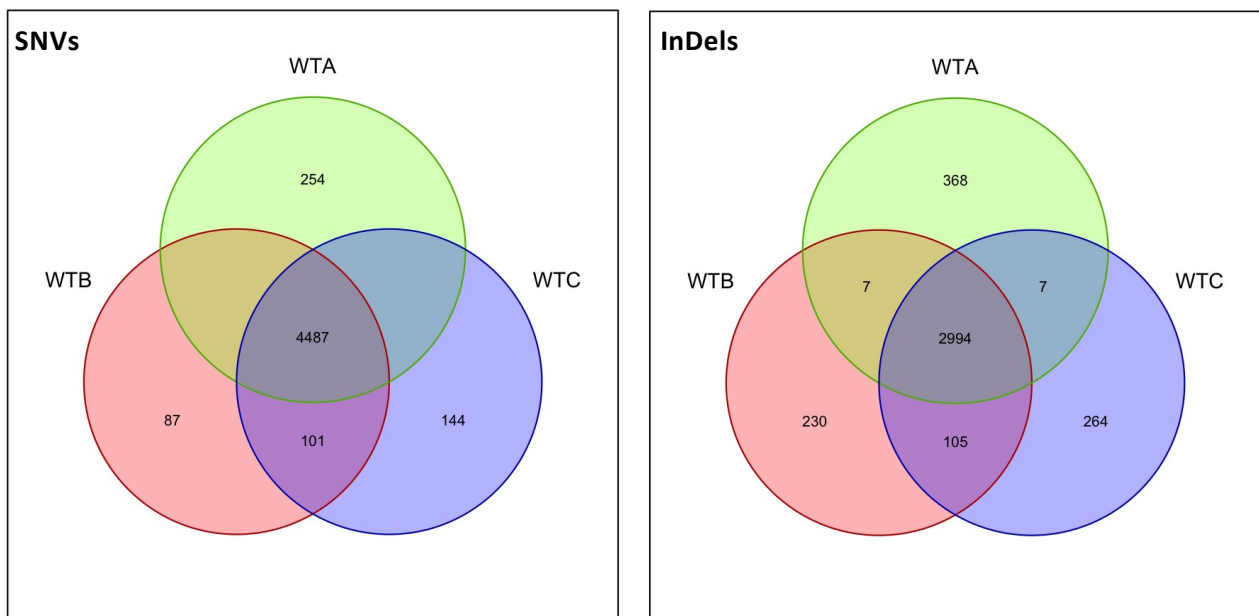

**Figure S5. Polymorphism between the wild types used in this study and the reference genome.** Venn diagram of (a) SNVs and (b) InDels diversity of the wild types sequenced in this study with comparison to the reference genome sequences previously released.

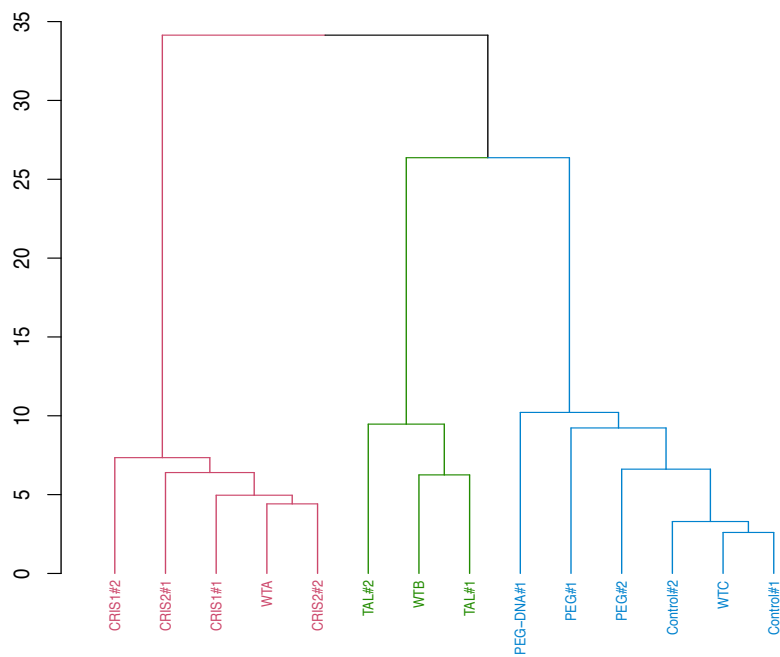

**Figure S6. Sample clustering based on all detected variants.**

Hierarchical clustering of the different samples, based on Euclidian distances between detected variants per sample.

Used functions :

```
dist.mat <- dist(t(var.mat), method = "euclidean")
```

```
hclust(dist.mat, method = "complete")
```

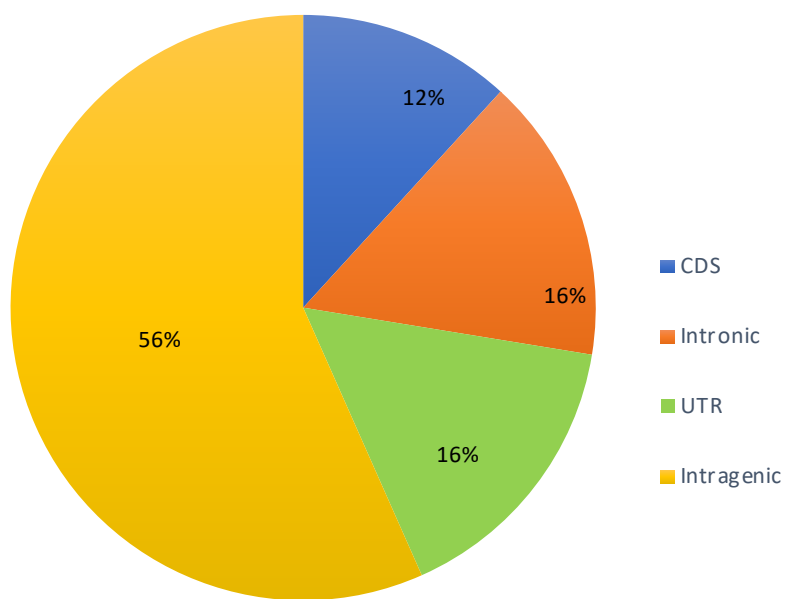

**Figure S7. Distribution of variants normalised by genomic regions sizes.**  
The number of variants for each type of genomic regions has been normalised by the proportion of each of these regions in the genome.

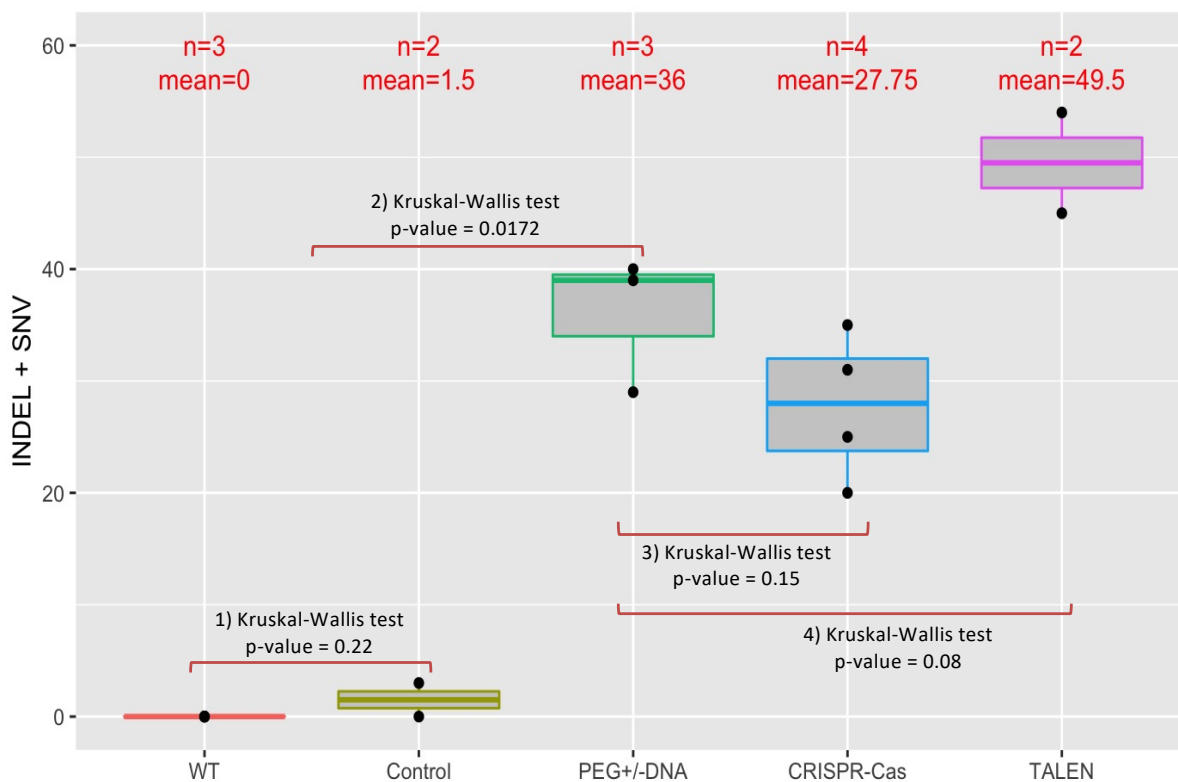

**Figure S8. Boxplot for Kruskal-Wallis test of number of variants for the different treatments.**

- 1) test between WT plants and Control plants.
- 2) test between WT + control plants and PEG+/-DNA treated plants.
- 3) test between PEG+/-DNA treated plants and CRISPR-Cas treated plants.
- 4) test between PEG+/-DNA treated plants and TALEN treated plants.



TCGAGGTCATTCATATGCTTGAGAAGAGAGTCGGGATAGTCCAAAAATAAAACAAAGGTAAGATTACCTGGTCAAAAGTGAAAACATCAGTTAAA  
 AGGTGGTATAAGTAAAATATCGGTAATAAAAGGTGGCCCAAAGTGAAATTTACTCTTTTCTACTATTATAAAAATTGAGGATGTTTTGTCGGTA  
 CTTTGATACGTCATTTTTTGATGAATTGGTTTTTAAGTTTTATTTCGCGATTTGAAATGCATATCTGTATTGAGTCGGTTTTTAAGTTTCGTTGC  
 TTTTGTAAATACAGAGGGATTTGTATAAGAAATATCTTTAAAAAACCCATATGCTAATTTGACATAATTTTTGAGAAAAATATATATTCAGGCG  
 AATTCCACAATGAACAATAAAGATTAAAATAGCTTGCCCCGTTGCAGCGATGGGTATTTTTCTAGTAAAATAAAAGATAAACTTAGACTC  
 AAAACATTTACAAAAACAACCCCTAAAGTCTAAAGCCCAAAGTGCTATGCACGATCCATAGCAAGCCAGCCCAACCAACCCAAACCC  
 ACCCCAGTGCAGCCAACCTGGCAAAATAGTCTCCACCCCGGCACTATCACCGTGAGTTGTCCGCACCACCGCACGTCTCGCAGCAAAAAA  
 AAAGAAAGAAAAAAGAAAAAGAAAAACAGCAGGTGGTCCGGTTCGTTGGGGCCGAAAAAGCAGGAGGATCGCGAGCAGCGACGAGGCCG  
 GCCCTCCCTCCGCTTCAAAGAAACGCCCCCATCGCCACTATATACATACCCCCCTCTCTCCATCCCCCAACCCATACCACCACCACA  
 CCACCACCTCTCCCCCTCGTGCAGGACGACGAGCTCTCCCCCTCCCCCTCCGCCGCGCGGTAACCACCCGCCCCCTCTCTCTTTCT  
 TTCTCCGTTTTTTTTTTCGTTCTCGGCTCGATCTTTGGCCTTGGTAGTTTGGTGGGCGAGAGCGGCTTCGTCGCCAGATCGGTGCGGGGAG  
 GGGCGGATCTCGCGGCTGGCGTCTCCGGCGTGAGTCGGCCGGATCTCGCGGGGAATGGGGCTCTCGGATGTAGATCTTCTTTCTTTCTTC  
 TTTTGTGGTAGAATTTGAATCCCTCAGCATGTGTATCCGCTAGTTTTTTCTTTTTCATGATTTGTGACAAATGCAGCCTCGTGGGAGCTTTTT  
 TTAGTGTAGACCATGGTGCAGCGGACTTAAGCTGATCCGATAGTCCAGTGTGGTGAATTCGCGATGGACTACAAGACCATGACGGTGATTA  
 TAAAGATCATGACATCGATTACAAGGATGACGATGACAAAGATGGCCCAAGAGAGGAAGGAGGATGGGCATCCACGGGTACCCATGGTGGAC  
 CTGAGAACCCTGGGCTACAGCCAGCAGCAGCAGGAGAAGATCAAGCCCAAGGTGAGAAGCACCCTGGCCAGCACCACGAGGCCCTGGTGGCC  
 ACGGCTTACCCACGCCCACATCGTGGCCCTGAGCCAGCACCCTCCGCCCTGGGCACCGTGGCCGTGAAGTACCAGGACATGATCGCCGCCCT  
 GCCCGAGGCCACCCACGAGGCCATCGTGGCGTGGCAAGCAGTGGAGCGGCGCAGAGCCCTGGAGGCCCTGCTGACCGTGGCCGGCAGCTG  
 AGAGGCCCCCCGGGACCCCTGGACACCGGCCAGCTGCTGAAGATCGCCAAGAGAGCGCGGCTGACTGCAGTGGAGGCGAGTGCATGCATGGCGCA  
 ATGCATGACGGGTGCCCCCTGAACCTGACCCCGGAGCAGGTGGTGGCCATGCGTAGTAAACAATGGTGGCAACAGGCTTTGAAACCGTACA  
 GCGCCTACTGCCAGTTCTCTGTCAAGCCACGGTCTGACTCCGGAGCAAGTTGTAGCGATTGCTAGTAATGGGGTGGCAACAGGCTCTTGAG  
 ACTGTTCAAGCCCTTCTACCAGTCTCTGTCAAGCCACGGCTGACGCCCAGCAAGTTGTAGCGATTGCTAGTAAACAATGGTGGCAACAGG  
 CTCTTGAACCGTACAGCGCTACTGCCAGTCTCTGTCAAGCCACGGTCTGACTCCGGAGCAAGTTGTAGCGATTGCTAGTAATATGGTGG  
 CAAACAGGCTCTTGAGACGGTTCAGCGCCTCTTCCAGTTCTCTGTCAAGCCACGGACTCACCCAGATCAAGTTGTAGCGATTGCTAGTAAT  
 GCGGGTGGCAACAGGCTCTTGAGACTGTTCAAGCCCTTCTACCAGTCTCTGTCAAGCCACGGCTGACGCCCAGCAAGTTGTAGCGATTG  
 CTAGTAATGGGGTGGCAACAGGCTCTTGAGACTGTTCAAGCCCTTCTACCAGTCTCTGTCAAGCCACGGCTGACGCCCAGCAAGTTGTAGCGATTG  
 AGCGATTGCTAGTAATGGGGTGGCAACAGGCTCTTGAGACTGTTCAAGCCCTTCTACCAGTCTCTGTCAAGCCACGGCTGACGCCCAGCAAGTTGT  
 CAGCGATTGCTAGTAATGGGGTGGCAACAGGCTCTTGAGACTGTTCAAGCCCTTCTACCAGTCTCTGTCAAGCCACGGCTGACGCCCAGCAAGTTGT  
 CAAGTTGTAGCGATTGCTAGTAAACAATGGTGGCAACAGGCTCTTGAAACCGTACAGCGCTACTGCCAGTCTCTGTCAAGCCACGGTCTGA  
 CTCCGGAGCAAGTTGTAGCGATTGCTAGTAAACAATGGTGGCAACAGGCTCTTGAAACCGTACAGCGCTACTGCCAGTCTCTGTCAAGCCCA  
 CGGTCTGACTCCGGAGCAAGTTGTAGCGATTGCTAGTAAACAATGGTGGCAACAGGCTCTTGAAACCGTACAGCGCTACTGCCAGTCTCTGT  
 CAAGCCACGGTCTGACTCCGGAGCAAGTTGTAGCGATTGCTAGTAATATGGTGGCAACAGGCTCTTGAGACGGTCAAGCGCTCTTCCAGT  
 TCTCTGTCAAGCCACGGACTCACCCAGATCAAGTTGTAGCGATTGCTAGTAATATGGTGGCAACAGGCTCTTGAGACGGTCTTGAGCGCTC  
 CTCCAGTCTCTGTCAAGCCACGGACTCACCCAGATCAAGTTGTAGCGATTGCTAGTAAACAATGGTGGCAACAGGCTCTTGAAACCGTAC  
 AGCGCTACTGCCAGTCTCTGTCAAGCCACGGTCTGACTCCGGAGCAAGTTGTAGCGATTGCTAGTAATATGGTGGCAACAGGCTCTTGGA  
 GACGGTTCAGCGCTCTTCCAGTCTCTGTCAAGCCACGGACTCACCCAGATCAAGTTGTAGCGATTGCTAGTAAACAATGGTGGCAACAG  
 GCTCTTGAAACCGTACAGCGCTACTGCCAGTCTCTGTCAAGCCACGGTCTGACTCCGGAGCAAGTTGTAGCGATTGCTAGTAATGGGGTGG  
 GCAACAGGCTCTTGAGACTGTTCAAGCCCTTCTACCAGTCTCTGTCAAGCCACGGCTGACGCCCAGCAAGTTGTAGCGATTGCTAGTAAT  
 TATTGGCGGAGGCGCGCTCGAGAGCATCGTGGCCAGCTGAGCAGACCCACCCGCTGGCCGCTGACCAACGACACCTGGTGGCC  
 CTGGCCTGCTGGCGGCGAGACCCGCTGGAGCGGCTGAAGAGGGGCTGCCCAAGCCGCTGATCAAGAGAACCAACAGAAGAAATCC  
 CCGAGAGAACCAGCCACAGAGTGGCCGGATCCAGCTGGTGAAGAGCGAGCTGGAGGAGAAGAAGAGCGAGCTGAGACACAAGCTGAAGTACGT  
 GCCCACGAGTACATCGAGCTGATCGAGATCGCCAGAACAGCACCAGGACAGAAATCCTGGAGATGAAGGTGATGGAGTTCTTTCATGAAGGTG  
 TACGGCTACAGAGGCAAGCACCCTGGCGGCGAGCAGAAAGCCGACGGCGCCATCTACACCGTGGGCGAGCCCATCGACTACGGCGTATCGTGG  
 ACACCAAGGCCTACAGCGGCGGCTACAACCTGCCATCGGCCAGGCCGACGAGATGCAGAGATACGTGGAGGAGAACCAGACCAGAAACAAGCA  
 CATCAACCCCAACGAGTGGTGAAGGTGTACCCAGCAGCGTGACCGAGTCAAGTTCTCTGTGAGCGGCCACTCAAGGGCAACTACAAG  
 GCCAGCTGACCAGACTGAACACATCAACACTGCAACGGCGCGCTGCTGAGCGTGGAGGAGCTGCTGATCGCGGCGGAGATGATCAAGGCCG  
 GCACCCTGACCCCTGGAGGAGGTGAGAAGAAAGTTCAACAACGGCGAGATCAACTTCAGAAGCTGATAACTGGAGTCTAGAGTCCAGCTGCAGGC  
 ATGCCCGTGAATCACCAGTCTCTCTTACAATCTATCTCTCTATAATAATGTGTGAGTAGTCCCAGATAAGGGAATTAGGGTCTTAT  
 AGGGTTTCGCTCATGTGTTGAGCATATAAGAAACCCCTAGTATGTATTTGTATTTGTAATAACTTCTATCAATAAAAATTTCTAATTCCTAAAA  
 CCAAAATCCAGGGGTACCGAGCTCGAATCAAGCT

**Figure S9. Sequence of the TALEN<sub>402</sub> expression cassette.**

The rice Actin 1 promoter is in blue, the three tandem FLAG epitope tags is in red, the SV40 NLS is in green, in pink the TAL effector repeat array is in pink, the nonspecific DNA cleavage domain of the FokI endonuclease is in orange, the CaMV35S terminator is in black. Codons corresponding to the repeat Variable Diresidue (RVD), specific to A (NI) are highlighted in blue, specific to T (NG) are highlighted in red, specific to G (NS) are highlighted in yellow. Nucleotide sequence recognized is GTGATTAGGGAAGAGTA.

TCGAGGTCATTCATATGCTTGAGAAGAGAGTCGGGATAGTCCAAAATAAAAACAAAGGTAAGATTACCTGGTCAAAAGTGAAAACATCAGTTAAA  
 AGGTGGTATAAGTAAAATATCGGTAATAAAAGGTGGCCCAAAGTGAAATTTACTCTTTTCTACTATTATAAAAATTGAGGATGTTTTGTCGGTA  
 CTTTGATACGTCATTTTTTGTATGAATTGGTTTTTAAGTTTTATTTCGCGATTGGAATGCATATCTGTATTTGAGTCGGTTTTTAAGTTTCGTTGC  
 TTTTGTAAATACAGAGGGATTTGTATAAGAAATATCTTTAAAAAACCCATATGCTAATTTGACATAATTTTTGAGAAAAATATATATTCAGGCG  
 AATTCCACAATGAACAATAAAGATTAAAATAGCTTGCCCCGTTGCAGCGATGGGTATTTTTTCTAGTAAAATAAAAGATAAACTTAGACTC  
 AAAACATTTACAAAAACAACCCCTAAAGTCCATAAGCCCAAAGTGCTATGCACGATCCATAGCAAGCCAGCCCAACCAACCCAAACCCAAACCC  
 ACCCCAGTGCAGCCAACTGGCAAAATAGTCTCCACCCCGGCATATCACCGTGAGTTGTCCGCACCACCGCACGTCTCGCAGCCAAAAA  
 AAAGAAAGAAAAAAGAAAAAGAAAAACAGCAGGTGGTCCGGTTCGTTGGGGCCGAAAAAGCAGGAGGATCGCGAGCAGCGACGAGGCCG  
 GCCCTCCCTCCGCTTCAAAGAAACGCCCCCATCGCCACTATATACATACCCCCCTCTCTCCATCCCCCAACCCACCACCACCA  
 CCACCACCTCTCCCCCTCGTGCAGGACGACGAGCTCTCCCCCTCCCCCTCCGCCGCGCGGTAACCACCCCGCCCTCTCTCTTTCT  
 TTCTCCGTTTTTTTTTTCGTTCTCGTCTCGATCTTTGGCCTTGGTAGTTTGGTGGGCGAGAGCGGCTTCGTCGCCAGATCGGTGCGGGGAG  
 GGGCGGATCTCGCGGCTGGCGTCTCCGGCGTGAGTCGGCCGGATCCTCGCGGGGAATGGGGCTCTCGGATGTAGATCTTCTTTCTTTCTTC  
 TTTTGTGGTAGAATTTGAATCCCTCAGCATGTGTTTCACTCCGTTAGTTTTCTTTTTCATGATTTGTGACAAATGCAGCCTCGTGGGAGCTTTTT  
 TTAGTGTAGACCATGGTGCAGCGGACTTAAGCTGATCCGATAGTCCAGTGTGGTGAATTCGCGATGGACTACAAGACCATGACGGTGATTA  
 TAAAGATCATGACATCGATTACAAGGATGACGATGACAGATGGCCCAAGAGAGGAGGAGGAGGATGGGCATCCAGGGTACCATGGTGGAC  
 CTGAGAACCCTGGGCTACAGCCAGCAGCAGCAGGAGAAGATCAAGCCCAAGGTGAGAAGCACCGTGGCCAGCACCACGAGGCCCTGGTGGCC  
 ACGGCTTACCCACGCCACATCGTGGCCCTGAGCCAGCACCCTCCGCCCTGGGCACCGTGGCCGTGAAGTACCAGGACATGATCGCCGCCCT  
 GCCCGAGGCCACCCACGAGGCCATCGTGGCGTGGCAAGCAGTGGAGCGGCGCAGAGCCCTGGAGGCCCTGCTGACCGTGGCCGGCAGCTG  
 AGAGGCCCCCGGGACCCCTGGACACCGGCCAGTGTGAAGATCGCCAAGAGAGCGCGGCTGACTGCAGTGGAGGCAGTGCATGCATGGCCGA  
 ATGCACTGACGGGTGCCCCCTGAACCTGACCCCGGAGCAGGTGGTGGCCATCGCTAGTCAATGACGGTGGCAACAGGCTTTGAGACGGTCCA  
 ACGCCTTCTACCAGTTCTCTGTCAAGCCACGGACTAACCCACGGCAAGTTGTAGCGATTGCTAGTAAATGGGTTGGCAACACAGGCTCTTGAG  
 ACTGTTCAAGCCTTCTACCAGTTCTCTGTCAAGCCACGGCTGACGCCCAGCAAGTTGTAGCGATTGCTAGTCAATGACGGTGGCAACAGG  
 CTCTTGAGACCGTCCAACGCCTTCTACCAGTTCTCTGTCAAGCCACGGACTAACCCACGGCAAGTTGTAGCGATTGCTAGTAAATGTTGGTGG  
 CAAACAGGCTCTTGAGACGGTTCAAGCCTCTTCCAGTTCTCTGTCAAGCCACGGACTAACCCAGATCAAGTTGTAGCGATTGCTAGTAAAT  
 ATTGGTGGCAACAGGCTCTTGAGACGGTTCAAGCCTCTTCCAGTTCTCTGTCAAGCCACGGACTAACCCAGATCAAGTTGTAGCGATTG  
 CTAGTAAATGGGTTGGCAACAGGCTCTTGAGACTGTTCAAGCCTTCTACCAGTTCTCTGTCAAGCCACGGCTTTGAGACGGTTCAGCGCCTG  
 AGCGATTGCTAGTAAACAATGGTGGCAACAGGCTCTTGAAACCGTACAGCCCTACTGCCAGTTCTCTGTCAAGCCACAGGCTCTTGAAACCGTA  
 CAAGTTGTAGCGATTGCTAGTCAATGACGGTGGTGGCAACAGGCTCTTGAGACCGTCCAACGCCTTCTACCAGTTCTCTGTCAAGCCACGGACTAA  
 CCCAGCGCAAGTTGTAGCGATTGCTAGTAAATGTTGGTGGCAACAGGCTCTTGAGACGGTTCAGCGCCTCTTCCAGTTCTCTGTCAAGCCCA  
 CGGACTAACCCAGATCAAGTTGTAGCGATTGCTAGTAAATGTTGGTGGCAACAGGCTCTTGAGACGGTTCAGCGCCTCTTCCAGTTCTCTGT  
 CAAGCCACGGACTAACCCAGATCAAGTTGTAGCGATTGCTAGTAAATGGGTTGGTGGCAACAGGCTCTTGAGACTGTTCAAGCCTTCTACCAG  
 TTCTCTGTCAAGCCACGGCTGACGCCGAGCAAGTTGTAGCGATTGCTAGTCAATGACGGTGGTGGCAACAGGCTTTGAGACCGTCCAACGCCT  
 TCTACCAGTTCTCTGTCAAGCCACGGACTAACCCACGGCAAGTTGTAGCGATTGCTAGTAAACAATGGTGGCAACAGGCTCTTGAAACCGTA  
 CAGCGCTACTGCCAGTTCTCTGTCAAGCCACGGCTGACTCCGGAGCAAGTTGTAGCGATTGCTAGTAAACAATGGTGGCAACAGGCTCTTG  
 AAACCGTACAGCGCTACTGCCAGTTCTCTGTCAAGCCACGGTCTGACTCCGGAGCAAGTTGTAGCGATTGCTAGTAAATGGGTTGGTGGCAACA  
 GGCTCTTGAGACTGTTCAAGCCTTCTACCAGTTCTCTGTCAAGCCACGGCCTGACGCCGAGCAAGTTGTAGCGATTGCTAGTAAATGTTGGT  
 GGCAACAGGCTCTTGAGACGGTTCAGCGCCTCTTCCAGTTCTCTGTCAAGCCACGGACTAACCCAGATCAAGTTGTAGCGATTGCTAGCC  
 ATGACGGCGGCAGGCCGGCTCGAGAGCATCGTGGCCAGTGAAGAGGCGCTGCCACAGCCCGCCCTGACCAACGACCACCTGGTGGC  
 CTGGCCCTGCTGGCGGCGAGACCCGCCCTGGACGCGGTGAAGAGGCGCTGCCACAGCCCGCCCTGATCAAGAGAACCAAGAGAAATC  
 CCCGAGAGAACCAGCCACAGAGTGGCCGGATCCAGCTGGTGAAGAGCGAGCTGGAGGAGAAGAAGAGCGAGCTGAGACACAAGCTGAAGTACG  
 TGCCCCAGAGTACATCGAGCTGATCGAGATCGCCAGAAACAGCACCCAGGACAGAATCCTGGAGATGAAGGTGATGGAGTTCTTCATGAAGGT  
 GTACGGCTACAGAGGCAAGCACCTGGCGGCGAGCAGAAAGCCGACGGCGCCATCTACACCGTGGGAGCCCATCGACTACGGCGTGATCGTG  
 GACACCAAGGCCTACAGCGCGGCTACAACCTGCCATCGGCCAGGCCGACGAGATGCAGAGATACGTGGAGGAGAACCAGACCAGAAACAAGC  
 ACATCAACCCCAACGAGTGGTGAAGGTGTACCCAGCAGCGTGACCGAGTTCAAGTTCTGTTGAGCGGCCACTCAAGGGCAACTACAA  
 GGCCAGCTGACCAGACTGAACCACATACCAACTGCAACGGCGCCGTGCTGAGCGTGGAGGAGCTGCTGATCGCGCGGAGATGATCAAGGCC  
 GGCACCCCTGACCCCTGGAGGAGGTGAGAAGAAAGTTCAACAACGGCGAGATCAACTTCAGAAGCTGATAACTGGAGTCTAGAGTCGACCTGCAGG  
 CATGCCGCTGAAATCACCAGTCTCTCTCTACAAATCTATCTCTCTATAATAATGTGTGAGTAGTTCAGATAAGGGAATTAGGGTTCTTA  
 TAGGGTTTCGCTCATGTGTTGAGCATATAAGAAACCCCTTAGTATGTATTTGTATTTGTAATAACTTCTATCAATAAAAATTTCTAATTCCTAAA  
 ACCAAAATCCAGGGTACCAGCTCGAATTCAGCT

**Figure S10. Sequence of the TALEN<sub>405</sub> expression cassette.**

The rice Actin 1 promoter is in blue, the three tandem FLAG epitope tags is in red, the SV40 NLS is in green, in pink the TAL effector repeat array is in pink, the nonspecific DNA cleavage domain of the FokI endonuclease is in orange, the CaMV35S terminator is in black. Codons corresponding to the repeat Variable Diresidue (RVD), specific to A (NI) are highlighted in blue, specific to T (NG) are highlighted in red, specific to G (NS) are highlighted in yellow, specific to C (HD) are highlighted in green. Nucleotide sequence recognized is ATGGCTAACGTAAGTCT.
