# Supplementary material for: Genome-wide specificity of plant genome editing by both CRISPR–Cas9 and TALEN
Source: PubMed Central journal article supplement (PMC9167288; doi:10.1038/s41598-022-13034-2), 2022-06-04
Supplement: 41598_2022_13034_MOESM4_ESM.pdf [file 41598_2022_13034_MOESM4_ESM.pdf]

**Table S1. Sample description and depth coverage.**

| Plant     | Sequencing technology | Experiment | Mean  | Granular median | % bases above 15X | % mapped reads |
|-----------|-----------------------|------------|-------|-----------------|-------------------|----------------|
| Control#1 | NovaSeq               | control    | 30.16 | 23              | 88.9              | 99.97          |
| Control#2 | HiSeq4000             | control    | 21.11 | 16              | 53.5              | 99.64          |
| PEG#1     | HiSeq4000             | control    | 24.26 | 18              | 66.0              | 99.65          |
| PEG#2     | NovaSeq               | control    | 14.84 | 11              | 16.7              | 99.96          |
| PEG-DNA#1 | NovaSeq               | control    | 13.87 | 11              | 15.4              | 99.97          |
| WTC       | NovaSeq               | control    | 28.29 | 23              | 88.0              | 99.95          |
| CRIS1#1   | HiSeq4000             | Crispr     | 26.93 | 20              | 80.4              | 99.91          |
| CRIS1#2   | HiSeq4000             | Crispr     | 34.20 | 26              | 95.1              | 99.89          |
| CRIS2#1   | HiSeq4000             | Crispr     | 39.05 | 30              | 97.4              | 99.91          |
| CRIS2#2   | HiSeq4000             | Crispr     | 32.91 | 23              | 91.8              | 95.15          |
| WTA       | HiSeq4000             | Crispr     | 34.08 | 25              | 94.6              | 99.92          |
| TAL#1     | HiSeq4000             | Talen      | 21.06 | 16              | 51.6              | 99.96          |
| TAL#2     | HiSeq4000             | Talen      | 19.76 | 15              | 48.4              | 99.71          |
| WTB       | HiSeq4000             | Talen      | 36.70 | 28              | 96.6              | 99.97          |

**Table S2. Repartition of variants (SNVs+InDel) on the different chromosomes.**

| Chromosome number | Chromosome length | Observed SNVs + InDels | Number of genes |
|-------------------|-------------------|------------------------|-----------------|
| Chr01             | 30242098          | 561                    | 2047            |
| Chr02             | 25998084          | 516                    | 1872            |
| Chr03             | 25551832          | 497                    | 1815            |
| Chr04             | 22344759          | 416                    | 1513            |
| Chr05             | 20681290          | 458                    | 1310            |
| Chr06             | 19533230          | 379                    | 1414            |
| Chr07             | 18116774          | 377                    | 1333            |
| Chr08             | 17934281          | 323                    | 1158            |
| Chr09             | 17794193          | 293                    | 1197            |
| Chr10             | 17530623          | 294                    | 1224            |
| Chr11             | 17494229          | 251                    | 1319            |
| Chr12             | 17435539          | 332                    | 1172            |
| Chr13             | 17250819          | 398                    | 1070            |
| Chr14             | 17248380          | 332                    | 1340            |
| Chr15             | 17009704          | 303                    | 1184            |
| Chr16             | 16572167          | 296                    | 1265            |
| Chr17             | 15984037          | 343                    | 1158            |
| Chr18             | 15735161          | 334                    | 937             |
| Chr19             | 15673097          | 310                    | 1025            |
| Chr20             | 15486712          | 328                    | 1116            |
| Chr21             | 15510460          | 361                    | 1016            |
| Chr22             | 15354560          | 235                    | 989             |
| Chr23             | 15138416          | 310                    | 1007            |
| Chr24             | 13755829          | 268                    | 959             |
| Chr25             | 11183739          | 217                    | 658             |
| Chr26             | 10125990          | 219                    | 716             |
| Chr27             | 5299892           | 97                     | 420             |

**Table S3. SNPs present in the Switzerland (CH) Gransden pedigree (Haas et al. 2020) are detected in the three different WT lines.**

| Position on Chromosomes* | Variant* type | WT <sub>A</sub> ratio | WT <sub>B</sub> ratio | WT <sub>C</sub> ratio |
|--------------------------|---------------|-----------------------|-----------------------|-----------------------|
| Chr04:9964399            | A>T           | 0                     | 1                     | 1                     |
| Chr07:9516941            | C>T           | 0                     | 1                     | 1                     |
| Chr13:4445259            | T>C           | 1                     | 1                     | 1                     |
| Chr20:832125             | A>T           | 0                     | 1                     | 1                     |
| Chr20:14648709           | C>T           | 0                     | 1                     | 1                     |
| Chr23:11248087           | T>C           | 1                     | 1                     | 1                     |
| Chr23:13598266           | C>A           | 0                     | 0                     | 1                     |
| Chr24:13315883           | T>C           | 1                     | 1                     | 1                     |

\* Data collected from Haas et al., 2020 (Supplementary file 3).

**Table S4. Sanger analysis of variants found by whole genome sequence analysis in the different control plants.**

| Position on chromosomes | Variant type | WT <sub>c</sub>    |                     | Control#1 |        | Control#2 |        | PEG#1 |        | PEG#2 |        | PEG-DNA#1 |        | PEG-DNA#2       |        |
|-------------------------|--------------|--------------------|---------------------|-----------|--------|-----------|--------|-------|--------|-------|--------|-----------|--------|-----------------|--------|
|                         |              | Ratio <sup>a</sup> | Sanger <sup>b</sup> | Ratio     | Sanger | Ratio     | Sanger | Ratio | Sanger | Ratio | Sanger | Ratio     | Sanger | Ratio           | Sanger |
| Chr16:14154133          | T>G          | 0                  | (-)                 | 0         | (-)    | 0         | (-)    | 0     | (-)    | 1     | (+)    | 0         | (-)    | nd <sup>c</sup> | nd     |
| Chr22:5281637           | G>C          | 0                  | (-)                 | 0         | (-)    | 0         | (-)    | 1     | (+)    | 0     | (-)    | 0         | (-)    | 0               | (-)    |
| Chr24:10845297          | T>C          | 0                  | (-)                 | 0         | (-)    | 0         | (-)    | 0     | (-)    | 0     | (-)    | 1         | (+)    | 0               | (-)    |

<sup>a</sup> correspond to the variant ratio (number of reads supporting called variant/number of reads covering the variant position).

<sup>b</sup> presence (+) or absence (-) of the variant in the different plants was analyzed by Sanger analysis.

<sup>c</sup> Not determined (nd).

**Table S5. Sanger analysis of variants found by whole genome sequence analysis in the different CRISPR-Cas edited plants.**

| Position on chromosomes     | Variant type | WT <sub>A</sub>    |                     | CRIS1#1 |                 | CRIS1#2 |        | CRIS2#1 |        | CRIS2#2            |        | Primer name |
|-----------------------------|--------------|--------------------|---------------------|---------|-----------------|---------|--------|---------|--------|--------------------|--------|-------------|
|                             |              | Ratio <sup>a</sup> | Sanger <sup>b</sup> | Ratio   | Sanger          | Ratio   | Sanger | Ratio   | Sanger | Ratio <sup>a</sup> | Sanger |             |
| Chr11:6608033               | G>T          | 0                  | (-)                 | 1       | (+)             | 0       | nd     | 0       | (-)    | 0                  | (-)    | chr11_660   |
| Chr03:4719499               | T>TTA        | 0                  | (-)                 | 1       | (+)             | 0       | (-)    | 0       | (-)    | 0                  | (-)    | chr03_471   |
| Chr22:874414                | C>A          | 0                  | (-)                 | 0       | (-)             | 1       | (+)    | 0       | (-)    | 0                  | (-)    | chr22_87    |
| Chr06:14871263              | T>TTA        | 0                  | (-)                 | 0       | nd <sup>c</sup> | 0       | (-)    | 1       | (+)    | 0                  | (-)    | chr06_148   |
| Chr19:5097814               | G>A          | 0                  | (-)                 | 0       | nd              | 0       | (-)    | 1       | (+)    | 0                  | (-)    | chr19_509   |
| Chr06:18710749              | C>CAT        | 0                  | (-)                 | 0       | (-)             | 0       | (-)    | 0       | (-)    | 1                  | (+)    | chr06_187   |
| Chr01:21565844 <sup>d</sup> | A>G          | 1                  | (+)                 | 1       | (+)             | 1       | (+)    | 1       | (+)    | 1                  | (+)    | chr01_215   |

<sup>a</sup> correspond to the variant ratio.

<sup>b</sup> presence (+) or absence (-) of the variant in the different plants was analyzed by Sanger analysis.

<sup>c</sup> Not determined (nd).

<sup>d</sup> This marker was used as a control.

**Table S6. Sanger analysis of variants found by whole genome sequence analysis in the different TALEN edited plants.**

| Position on chromosomes | Variant type | WT <sub>B</sub>    |                     | TAL#1 |        | TAL#2 |        | Primer name |
|-------------------------|--------------|--------------------|---------------------|-------|--------|-------|--------|-------------|
|                         |              | Ratio <sup>a</sup> | Sanger <sup>b</sup> | Ratio | Sanger | Ratio | Sanger |             |
| Chr14:12797646          | TGTTACGA>T   | 0                  | (-)                 | 0     | (-)    | 1     | (+)    | chr14_127   |
| Chr10:14315450          | A17del>A     | 0                  | (-)                 | 1     | (+)    | 0     | (-)    | chr10_143   |
| Chr10:14329574          | GAAA>ATAT    | 0                  | (-)                 | 1     | (+)    | 0     | (-)    | chr10_143_2 |
| Chr07:17384449c         | G56del>G     | 1                  | (+)                 | 1     | (+)    | 1     | (+)    | chr07_173   |

<sup>a</sup> correspond to the variant ratio.

<sup>b</sup> presence (+) or absence (-) of the variant in the different plants was analyzed by Sanger analysis.

<sup>c</sup> This marker was used as a control.

**Table S7. Spontaneous mutations observed in treated plants compared to WTs.**

| Position on chromosomes | Variant type | Treated plants (ratio= 1)          | Corresponding WT ratio |
|-------------------------|--------------|------------------------------------|------------------------|
| Chr07:5186318           | C>CTA        | PEG#2                              | 0.529                  |
| Chr03:15558655          | C>A          | TAL#1                              | 0.348                  |
| Chr16:11843701          | C>T          | TAL#1                              | 0.333                  |
| Chr22:3967666           | C>T          | TAL#1                              | 0.421                  |
| Chr17:11774744          | A>AAT        | TAL#1                              | 0.35                   |
| Chr07:7684665           | G>A          | CRIS1#2                            | 0.3                    |
| Chr13:12620517          | A>T          | CRIS1#2; CRIS2#2                   | 0.148                  |
| Chr20:7057654           | C>T          | CRIS1#1; CRIS1#2; CRIS2#1; CRIS2#2 | 0.176                  |
| Chr08:3426363           | GAT>G        | CRIS1#2                            | 0.316                  |
| Chr08:4839068           | G>GAT        | CRIS1#1; CRIS1#2; CRIS2#1; CRIS2#2 | 0.278                  |
| Chr09:12282642          | G>GTA        | CRIS1#2                            | 0.357                  |
| Chr12:8195075           | C>CAT        | CRIS1#2; CRIS2#2                   | 0.2                    |
| Chr12:16266255          | C>CAT        | CRIS1#1; CRIS1#2; CRIS2#1; CRIS2#2 | 0.222                  |
| Chr18:5002913           | CAT>C        | CRIS1#1; CRIS1#2; CRIS2#1; CRIS2#2 | 0.095                  |

**Table S8. Variations detected in genes and possible consequences on corresponding proteins.**

| Position on chromosomes | Variant change | Gene Name    | Variant location | conditions | Protein change |
|-------------------------|----------------|--------------|------------------|------------|----------------|
| Chr24:10845297          | T>C            | Pp3c24_16550 | Intron           | PEG-DNA#1  | np             |
| Chr22:14586029          | A>AAT          | Pp3c22_21780 | Intron           | CRIS2#2    | np             |
| Chr22:5281637           | G>C            | Pp3c22_8540  | 5_prime_UTR      | PEG#1      | np             |
| Chr20:5018396           | G>A            | Pp3c20_8180  | Intron           | TAL#1      | np             |
| Chr19:5097814           | G>A            | Pp3c19_8330  | 3_prime_UTR      | CRIS2#1    | np             |
| Chr17:1436880           | C>CAT          | Pp3c17_1970  | Intron           | PEG-DNA#1  | np             |
| Chr17:793466            | G>A            | Pp3c17_930   | Exon1            | PEG#1      | Leu260Leu      |
| Chr16:14154133          | T>G            | Pp3c16_22830 | Exon2            | PEG#2      | Leu260Leu      |
| Chr16:677406            | T14del>T       | Pp3c16_1070  | Intron           | CRIS1#1    | np             |
| Chr14:12797646          | TGTTACCGA>T    | Pp3c14_19390 | Intron           | TAL#2      | np             |
| Chr13_12620517          | A>T            | Pp3c13_17680 | 3' UTR           | CRIS2#2    | np             |
| Chr11:1627481           | CGC>AT         | Pp3c11_2830  | Intron           | TAL#2      | np             |
| Chr10:14315450          | A17del>A       | Pp3c10_20860 | 5_prime_UTR      | TAL#1      | np             |
| Chr10:14316818          | C>A            | Pp3c10_20860 | Intron           | TAL#1      | np             |
| Chr10:14320441          | C>G            | Pp3c10_20860 | Intron           | TAL#1      | np             |
| Chr10:14329574          | GAAA>ATAT      | Pp3c10_20860 | Intron           | TAL#1      | np             |
| Chr09:16179557          | G>GTA          | Pp3c9_23640  | Intron           | PEG-DNA#1  | np             |
| Chr09:11300798          | GTATA>G        | Pp3c9_16610  | 3_prime_UTR      | PEG#1      | np             |
| Chr09:9844481           | T>TTA          | Pp3c9_14700  | Intron           | CRIS1#2    | np             |
| Chr06:14871263          | T>TTA          | Pp3c6_23030  | Intron           | CRIS2#1    | np             |
| Chr06:7346938           | G>T            | Pp3c6_11420  | Intron           | TAL#1      | np             |

<sup>a</sup> Not predictable (np).



**Table S9. Sequences and positions of possible off target sites for sgRNA1 and sgRNA2 identified using the CRISPOR v2.0 tool (<http://crispor.tefor.net>).**

| Locus name           | Target sequence <sup>a</sup> + PAM                                  | Position on <i>P. patens</i> reference genome from Phytozome <sup>b</sup> |
|----------------------|---------------------------------------------------------------------|---------------------------------------------------------------------------|
| <b>sgRNA1 Target</b> | <b>gaagagtatagctagagtaTGG</b>                                       | Chr08:10812103 to 10812081                                                |
| sgRNA1 Off-Target#1  | gaagagt <b>g</b> tag <b>a</b> gtagagtaGGG                           | Chr07:4705222 to 4705244                                                  |
| sgRNA1 Off-Target#2  | gaag <b>ct</b> tattgtctagag <b>tt</b> AGG                           | Chr05:17438841 to 17438819                                                |
| sgRNA1 Off-Target#3  | <b>g</b> ta <b>a</b> agtatag <b>t</b> ctag <b>g</b> g <b>tt</b> GGG | Chr24:6867383 to 6867405                                                  |
| sgRNA1 Off-Target#4  | <b>ca</b> ag <b>c</b> gtata <b>ct</b> ct <b>t</b> gagtaTGG          | Chr14:2675353 to 2675375                                                  |
| sgRNA1 Off-Target#5  | gaat <b>att</b> ata <b>a</b> tctagag <b>tt</b> GGG                  | Chr22:3453377 to 3453399                                                  |
| sgRNA1 Off-Target#6  | <b>gca</b> aagtatag <b>tata</b> aagtaGGG                            | Chr06:582960 to 582982                                                    |
| sgRNA1 Off-Target#7  | gaagac <b>t</b> atag <b>tt</b> tagag <b>gg</b> CGG                  | Chr02:13705150 to 13705128                                                |
| sgRNA1 Off-Target#8  | gaa <b>a</b> agtat <b>gtca</b> agactaAGG                            | Chr05:6043528 to 6043550                                                  |
| sgRNA1 Off-Target#9  | gaagac <b>t</b> atat <b>ttctata</b> ctaCGG                          | Chr17:5887705 to 5887683                                                  |
| <b>sgRNA2 Target</b> | <b>tgagcgttaccgggaccagaAGG</b>                                      | Chr08:10812681 to 10812659                                                |
| sgRNA2 Off-Target#1  | tga <b>g</b> gag <b>tcca</b> aggaccagaAGG                           | Chr16:7631517 to 7631494                                                  |
| sgRNA2 Off-Target#2  | tga <b>agg</b> ttac <b>ctgg</b> accag=AGG                           | Chr4:12028646 to 12028667                                                 |
| sgRNA2 Off-Target#3  | tggcgt <b>gac</b> gggag <b>g</b> cagaAGG                            | Chr17:4446370 to 4446348                                                  |
| sgRNA2 Off-Target#4  | tgagcgt <b>tc</b> aggtac <b>ctga</b> AGG                            | Chr09:9115552 to 9115574                                                  |

<sup>a</sup> Mismatches with the target sites are indicated in red).

<sup>b</sup> Coordinates of the off-target sequences were identified using Basic Local Alignment Search Tool (<http://phytozome.jgi.doe.gov/pz/portal.html#!search>).

**Table S10. List of PCR primers used for validation of the variants.**

| Position of variants | Forward sequence (5'-3')            | Reverse sequence (5'-3')              |
|----------------------|-------------------------------------|---------------------------------------|
| Chr16:14154133       | chr16_141f: ATCCTCAAGGAAAAGGGCCG    | chr16_141r: TAGGGCACATAGCGTGGTTG      |
| Chr22:5281637        | chr22_528f: AGTCTTCCAGGCCGCTAAAC    | chr22_528r: TTCGTTGGCTGGAACGATGA      |
| Chr24:10845297       | chr24_108f: AGTCAAGCTCCTGTGCAGTG    | chr24_108r: CCTCCTTCTCCCTCCTACC       |
| Chr11:6608033        | chr11_660f: TGCCTTGGCTCATGTTTGTACT  | chr11_660r: TGAAGCATGGCAAGATCTACA     |
| Chr03:4719499        | chr03_471f: GTTTCCTAAAGGCTCCTCCT    | chr03_471r: AAAGGCTGGCGCATCACTAT      |
| Chr22:874414         | chr22_87f: TGCACTTCTTCAGCCATTAGC    | chr22_87r: TCCATTCCGCTTGCCCAATA       |
| Chr06:14871263       | chr06_148f: TCCTGCATGACAGTGAGCAA    | chr06_148r: TACGTGTCGCGATTGTGGAA      |
| Chr19:5097814        | chr19_509f: AACTCCGTCCTGTGCTCCA     | chr19_509r: CACACGAATGGTTGGCAGTG      |
| Chr06:18710749       | chr06_187f: CCGCTCAAAGCTAACTGCTC    | chr06_187r: TTAATGCATTTAAGTTCTGACCACA |
| Chr01:21565844       | chr01_215f: CAGGGTTTCTCACGCCAGAT    | chr01_215r: TCCTTCGACCTCCAGATGT       |
| Chr14:12797646       | chr14_127f: CTCAAGTTTGTTCAGAGAGGAGA | chr14_127r: TGGTTAGCGGATGGGGTCTA      |
| Chr10:14315450       | chr10_143f: GCTGACACAGACCTTCTCC     | chr10_143r: AGGCAAAATGAGACGAGCGA      |
| Chr10:14329574       | chr10_143_2f: AACACCTCGTACGCCAAGAG  | chr10_143_2r: GACCAGGTGTCGTCACAAA     |
| Chr07:17384449       | chr07_173f: CATTAGTCCGTCACCCA       | chr07_173r: AGATGCCCCATTTCCACCTG      |

**Table S11. List of PCR primers used for the *APT* gene sequence analysis.**

| Primer name | Sequence (5'-3')      |
|-------------|-----------------------|
| Rad51.1#6   | TGAGGAGGAAGTTCATCATGG |
| Rad51.1#7   | ACCGCCAATGGGTTTATGC   |
| PpAPT#25    | GTCGTCACTCTCGGTTTTG   |
| PpAPT#26    | CATGCTTCACAGGTTGTTG   |
